# Supplementary material for: Early improvement in severely ill patients with pneumonia treated with ceftobiprole: a retrospective analysis of two major trials
Source: PubMed Central journal article supplement (PMC6390565; doi:10.1186/s12879-019-3820-y), 2019-02-26
Supplement: 12879_2019_3820_MOESM7_ESM.pdf [file 12879_2019_3820_MOESM7_ESM.pdf]

▨ Cefotibiprole    ■ Comparator

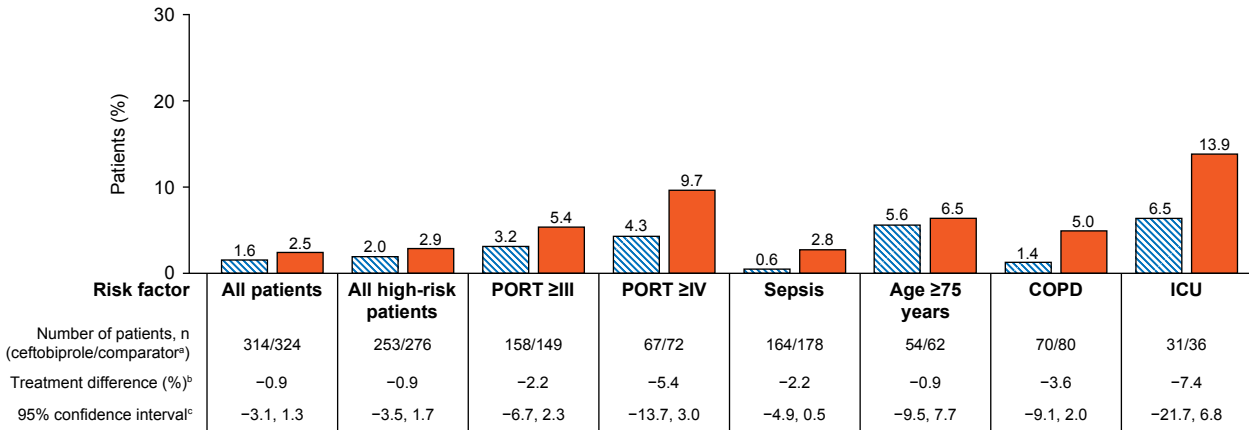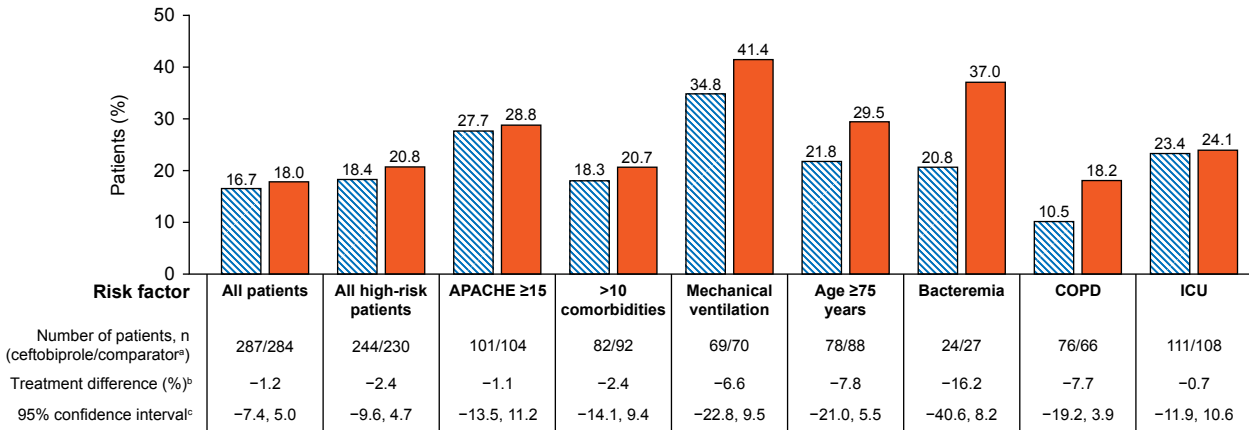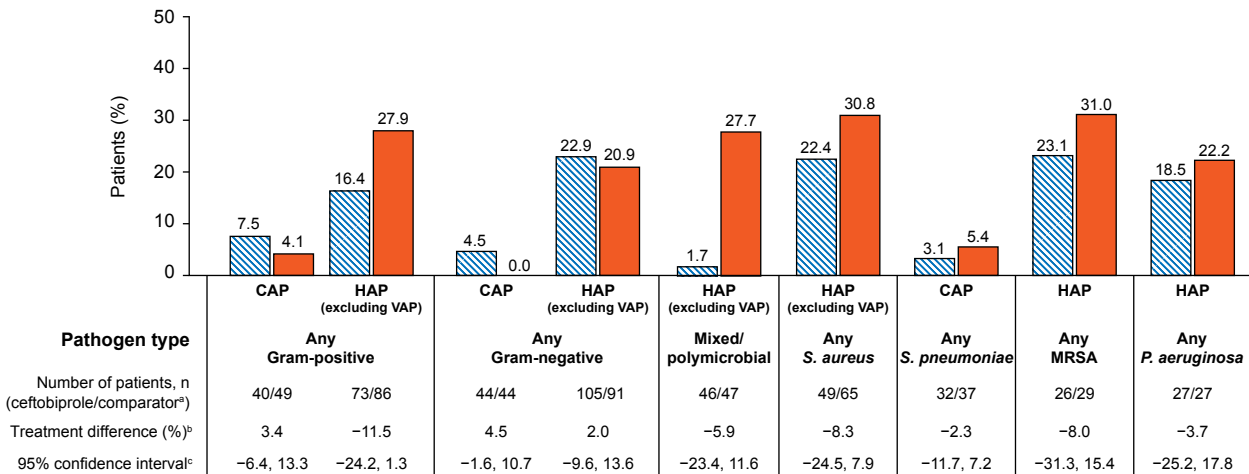

APACHE, Acute Physiology and Chronic Health Evaluation; CAP, community-acquired pneumonia; CI, confidence interval; COPD, chronic obstructive pulmonary disease; HAP, hospital-acquired pneumonia; ICU, intensive care unit; ITT, intention-to-treat; PORT, Patient Outcome Research Team; VAP, ventilator-associated pneumonia.
